# Supplementary material for: Synergistic size and charge conversions of functionalized PAMAM dendrimers under the acidic tumor microenvironment
Source: Royal Society of Chemistry journal article supplement (doi:10.1039/d2bm00643j), 2022-01-01
Supplement: d2bm00643j1.pdf [file d2bm00643j1.pdf]

## Supplementary Information

### **Synergistic Size and Charge Conversions of Functionalized PAMAM Dendrimers under Acidic Tumor Microenvironment**

*Liao Zhang<sup>†</sup>, Shumin Hu<sup>†</sup>, Leitao Zhang<sup>†</sup>, Wenlan Wu<sup>‡</sup>, Qiuli Cheng<sup>†</sup>, Junbo Li<sup>†,\*</sup>, and Ravin Narain<sup>§,\*</sup>*

*<sup>†</sup>School of Chemical Engineering & Pharmaceutics, Henan University of Science and  
Technology, Luoyang 471023, P. R. China*

*<sup>‡</sup>School of Medicine, Henan University of Science & Technology, Luoyang 471023, P. R. China*

*<sup>§</sup>Department of Chemical and Materials Engineering, University of Alberta, Edmonton, Alberta  
T6G 2G6, Canada*

\* Corresponding authors:

lijunbo@haust.edu.cn (Junbo Li)

narain@ualberta.ca (Ravin Narain)

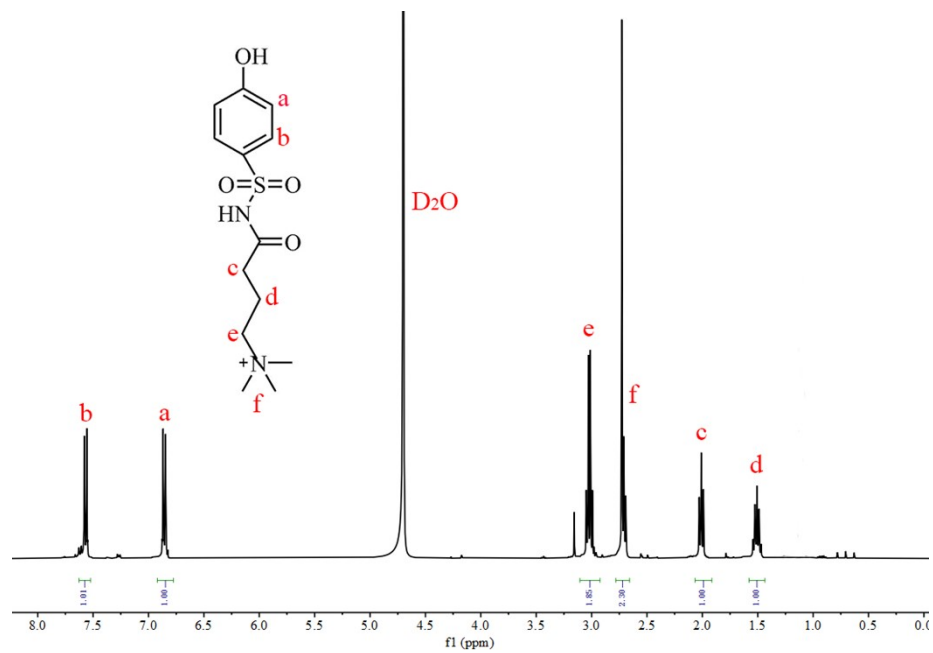

**Figure S1.**  $^1\text{H}$  NMR spectrum of AB using  $\text{D}_2\text{O}$  as the solvent.

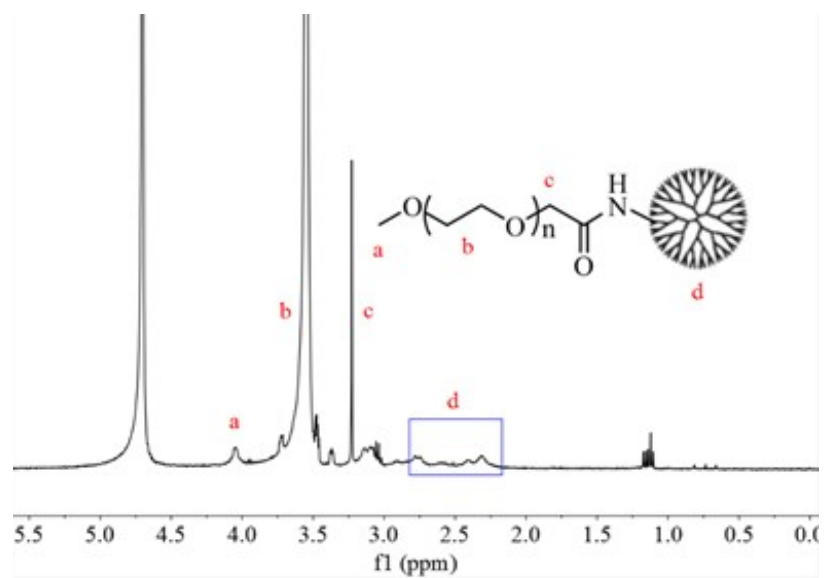

**Figure S2.**  $^1\text{H}$  NMR spectrum of G4-PEG using  $\text{D}_2\text{O}$  as the solvent.

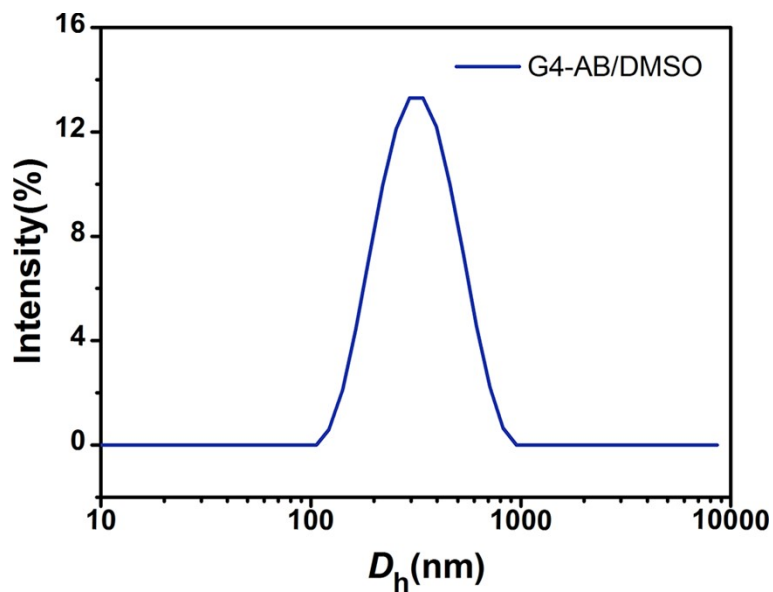

**Figure S3.** The particle sizes of G4-AB in DMSO.

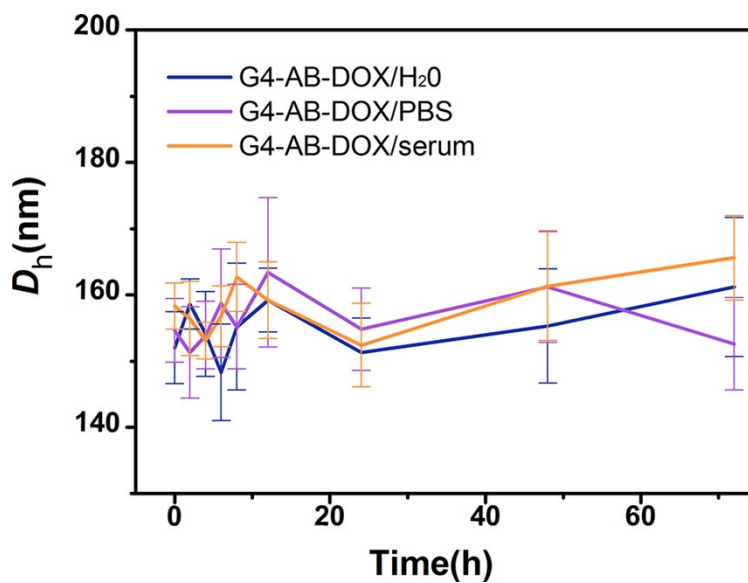

**Figure S4.** Particle size of G4-AB-DOX micelles in H<sub>2</sub>O, PBS (pH 7.4) solutions and serum solutions for 72 h (SD, n=3).

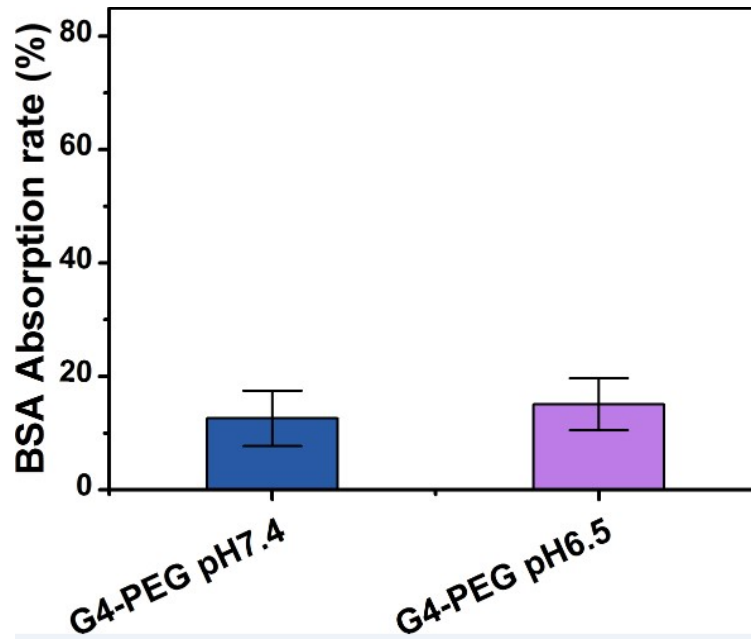

**Figure S5.** The BSA absorption rate of G4 -PEG micelles under different pH conditions at room temperature (SD, n=5).

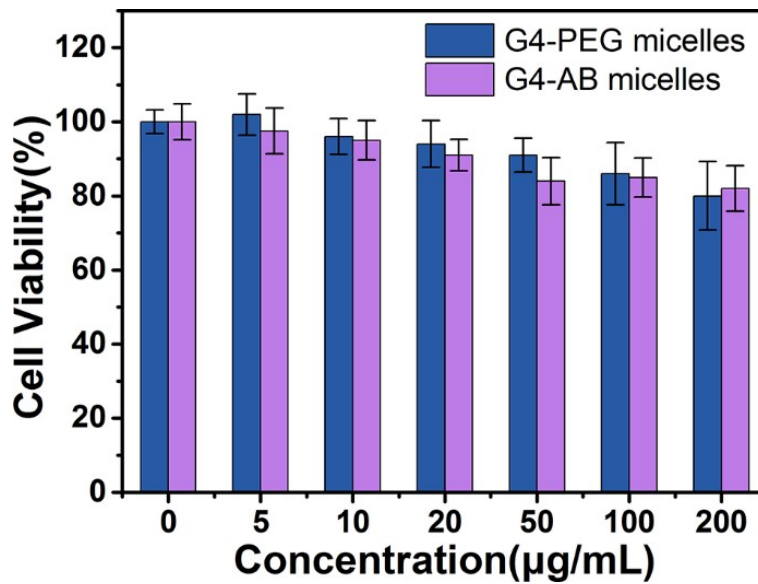

**Figure S6.** In vitro cytotoxicity of G4-PEG and G4-AB micelles against L02 cells after 24 h of treatment (SD, n=3).

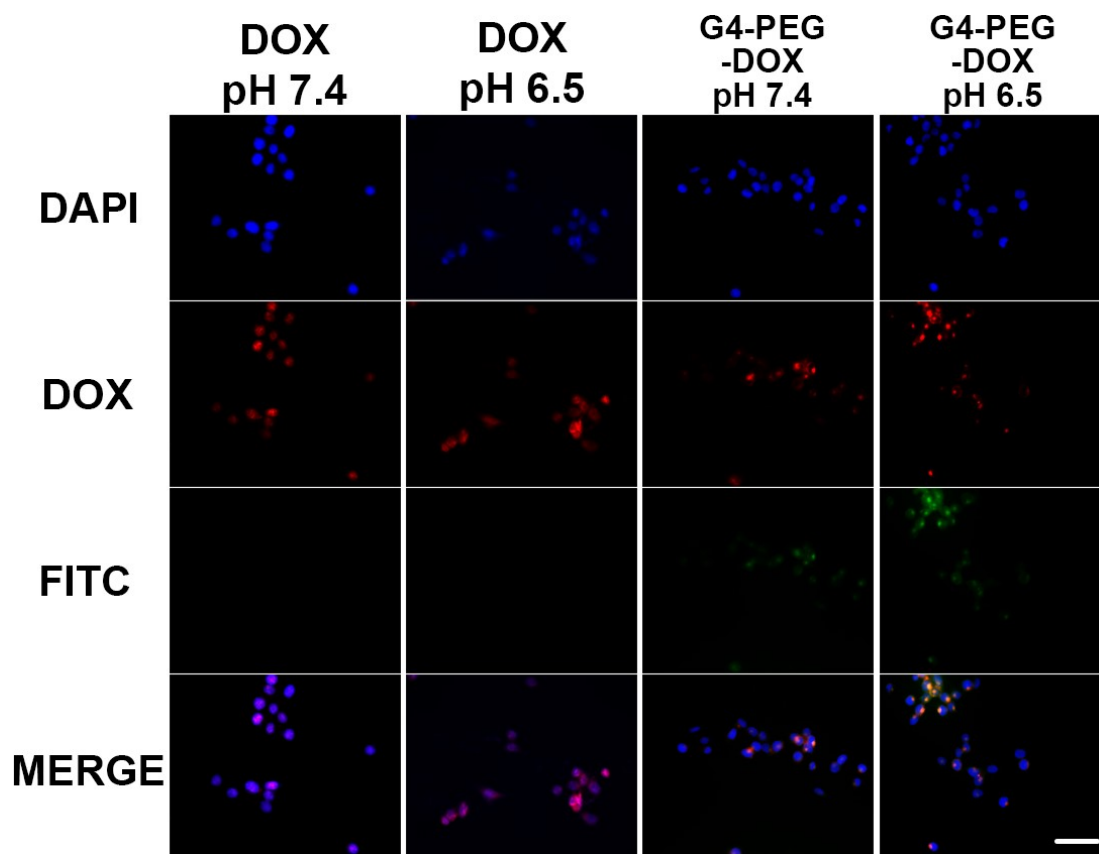

**Figure S7.** Fluorescence image of HepG2 cells after being incubated with DOX and G4-PEG-DOX micelles at pH 7.4 and 6.5 for 4 h (scale bar: 50  $\mu$ m).

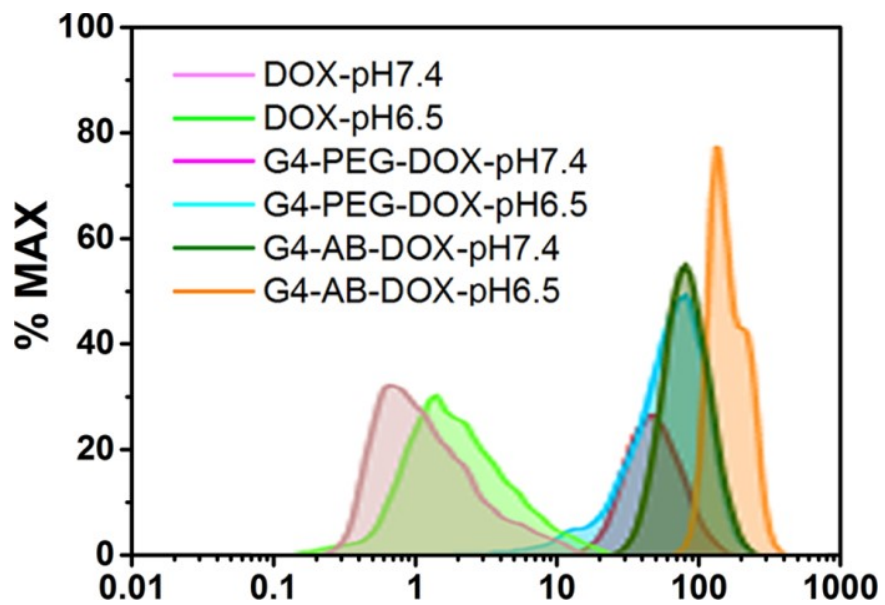

**Figure S8.** Flow-cytometric histograms of HepG2 cells treated with DOX, G4-PEG-DOX and G4-AB-DOX at 7.4 or 6.5.
